# Supplementary material for: Preparation of hexagonal BN whiskers synthesized at low temperature and their application in fabricating an electrochemical nitrite sensor
Source: Royal Society of Chemistry journal article supplement (doi:10.1039/c5ra27234c), 2016-01-01
Supplement: c5ra27234c1.pdf [file c5ra27234c1.pdf]

## Electronic Supporting Information

# **Preparation of hexagonal BN whiskers synthesized at low temperature and its application in fabricating electrochemical nitrite sensor**

Wenpo Luo<sup>a</sup>, Tao Yang<sup>a</sup>, Lei Su<sup>b</sup>, Kuo-Chih Chou<sup>a</sup>, Xinmei Hou<sup>a\*</sup>

<sup>a</sup> State Key Laboratory of Advanced Metallurgy, University of Science and Technology Beijing, Beijing 100083, China

Email: [houxinmei@ustb.edu.cn](mailto:houxinmei@ustb.edu.cn)

<sup>b</sup> Research Center for Bioengineering and Sensing Technology, School of Chemistry and Biological Engineering, University of Science and Technology Beijing, Beijing 100083, China.

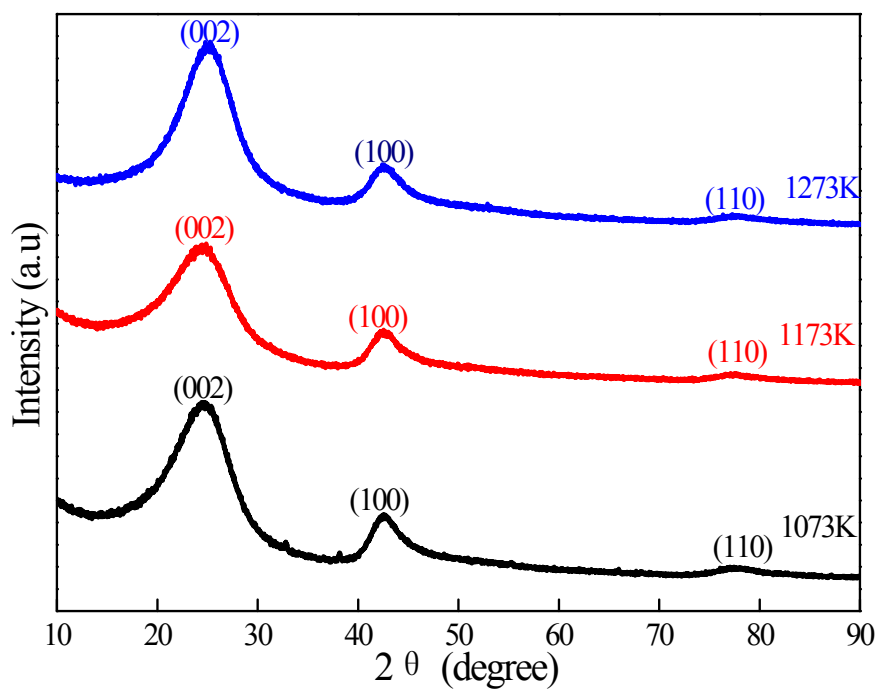

**Fig. S1** XRD pattern of the sample obtained at different temperature

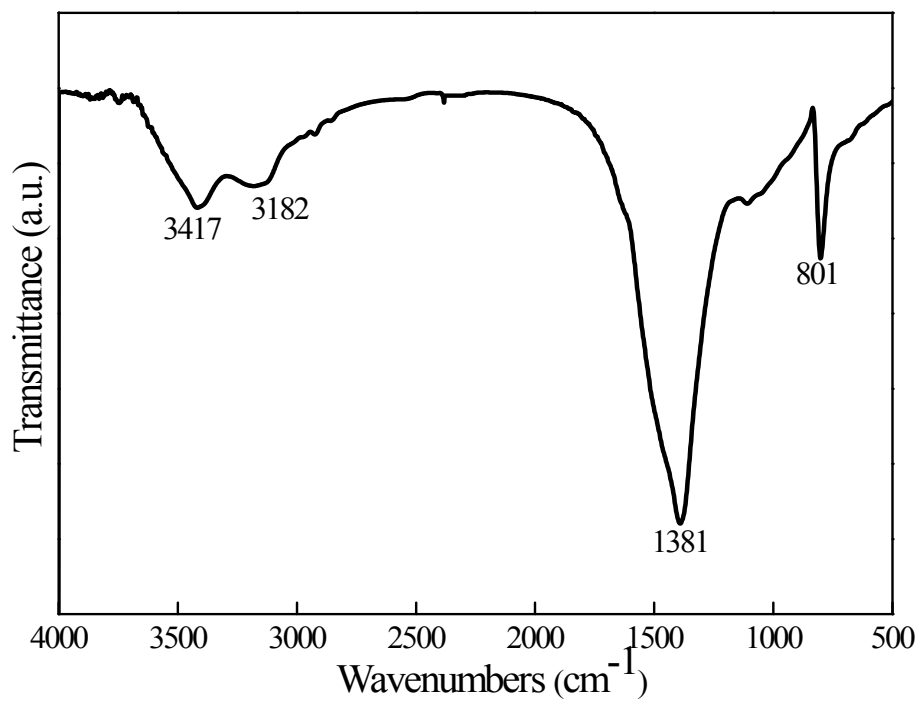

**Fig. S2** FT-IR spectra of the BN whiskers

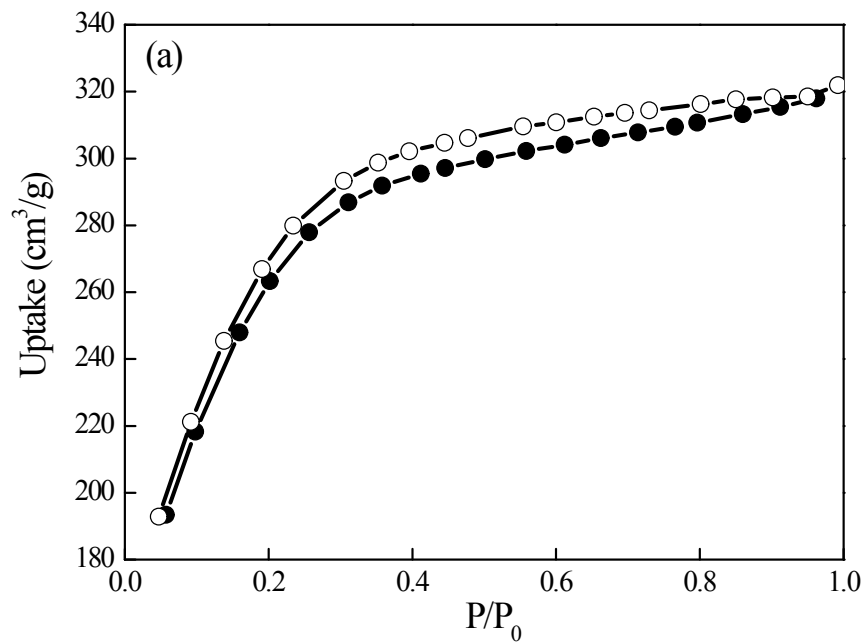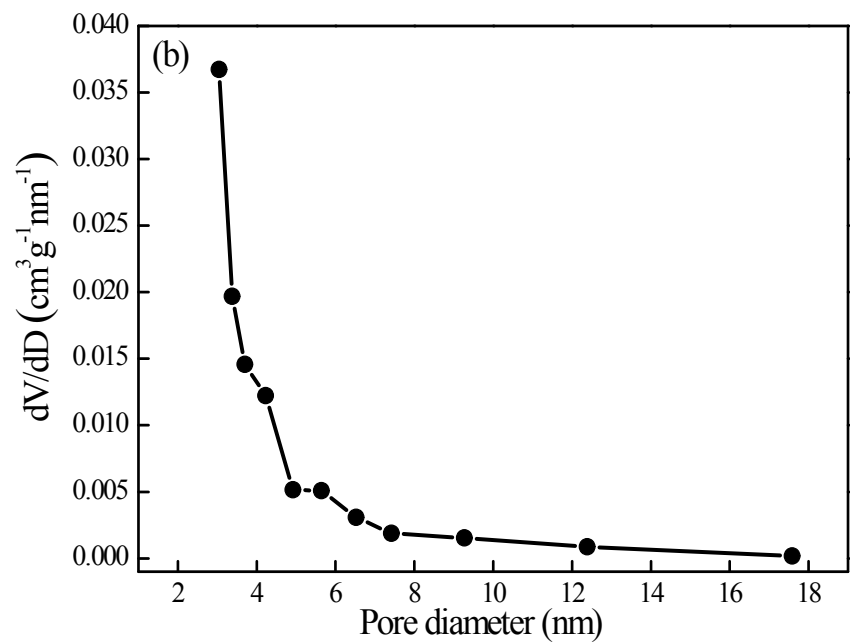

**Fig. S3** (a) N<sub>2</sub> adsorption-desorption isotherms and (b) pore size distribution of the poorly crystallized BN whiskers

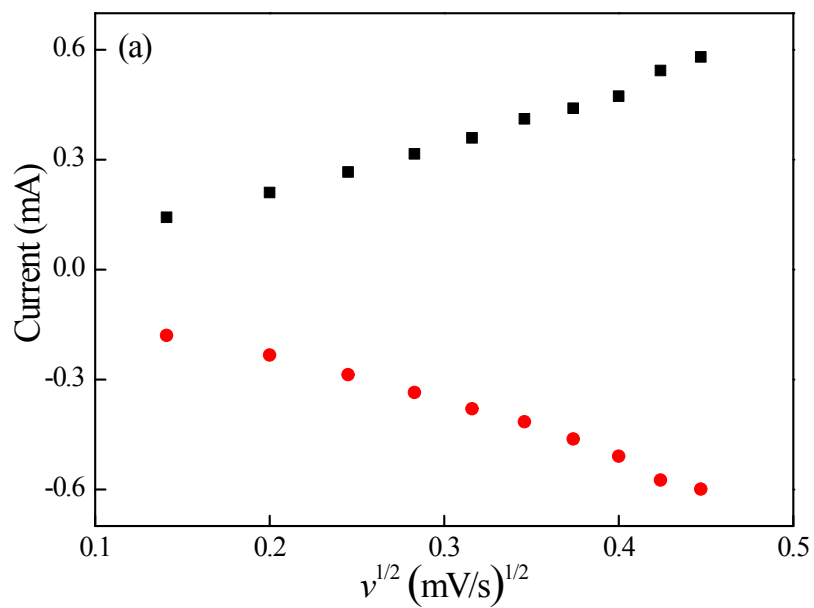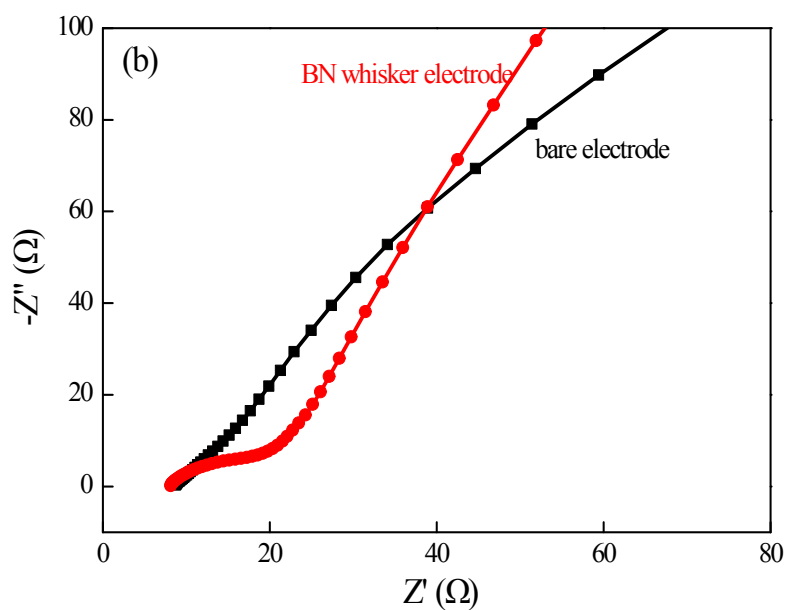

**Fig. S4** (a) The plot of anodic/cathodic peak currents versus the square root of scan rate; (b) Nyquist plots of the BN whisker electrode and bare electrode without BN whisker in 0.10 M KCl containing 5 mM  $[\text{Fe}(\text{CN})_6]^{3-/4-}$

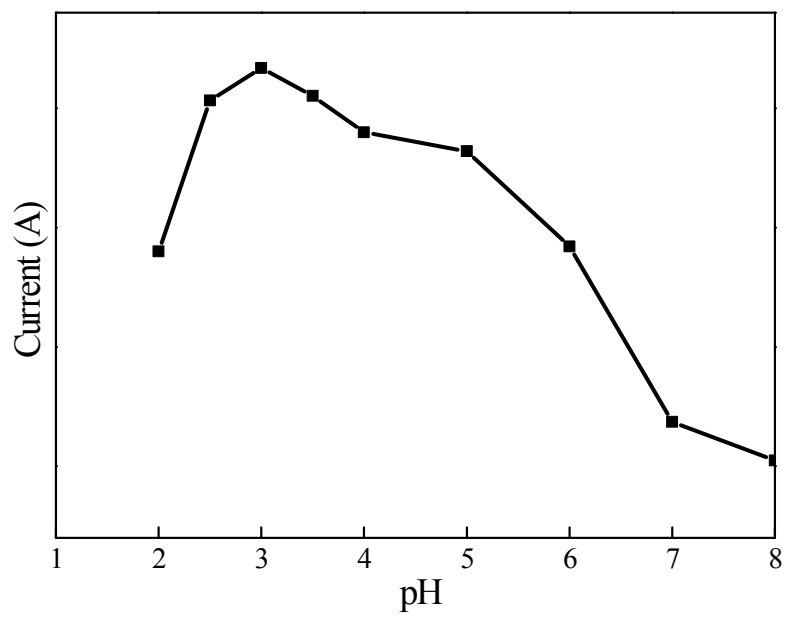

**Fig. S5** The relationship between the oxidation peak currents and the pH values

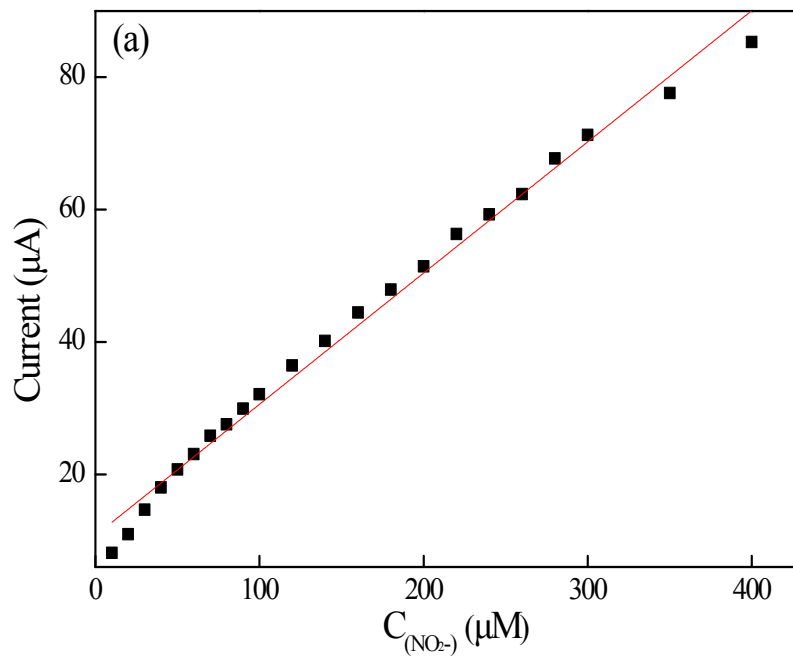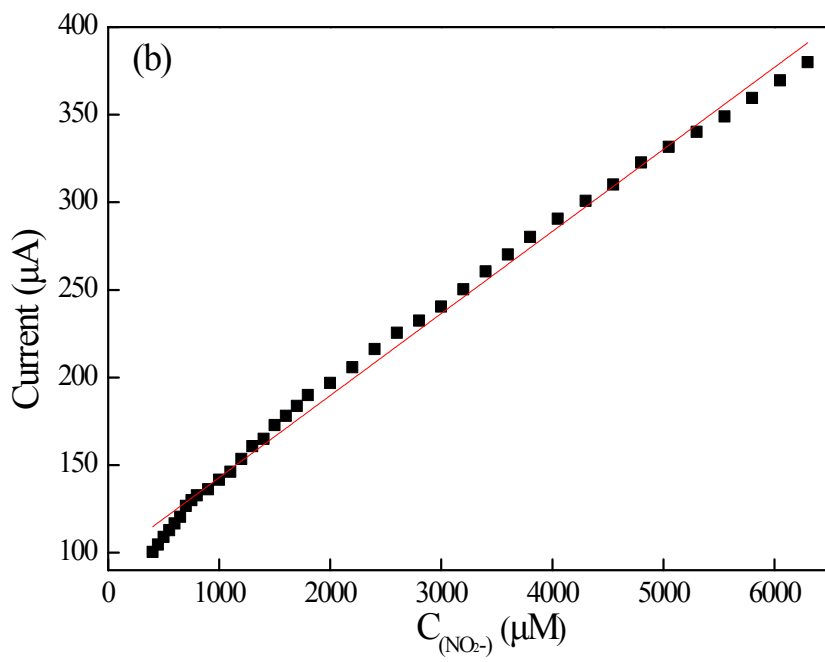

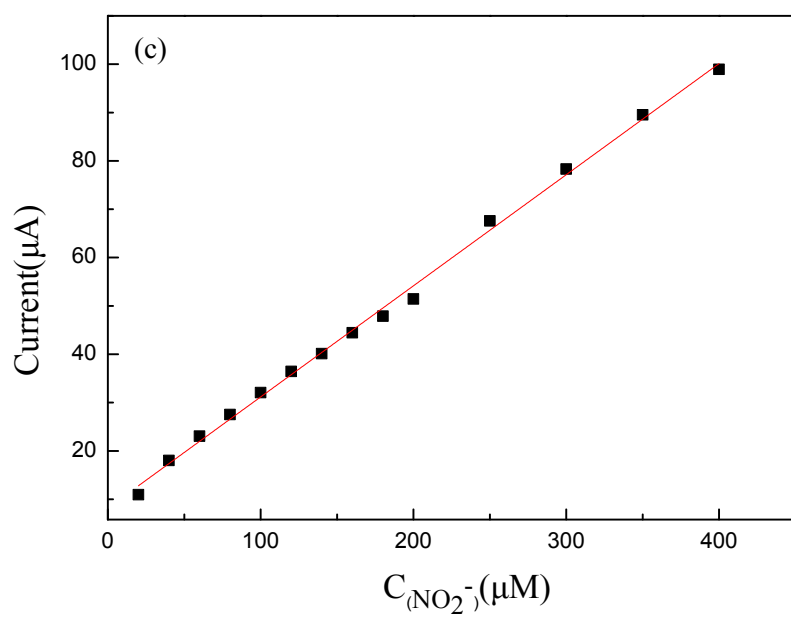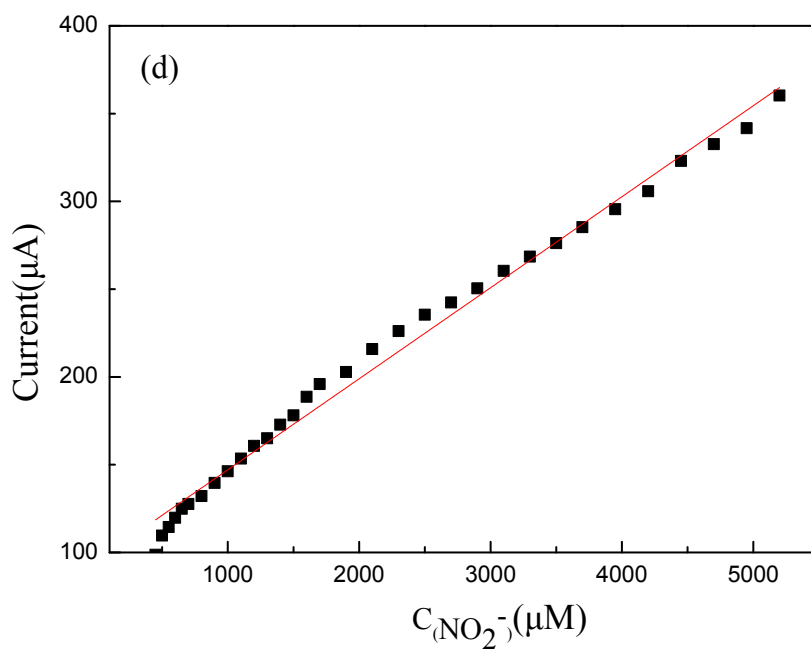

**Fig. S6** The relationship between the current and corresponding concentration of  $\text{NaNO}_2$  (a,b): the poorly crystallized BN whiskers electrode; (c,d): the highly crystallized BN whiskers electrode

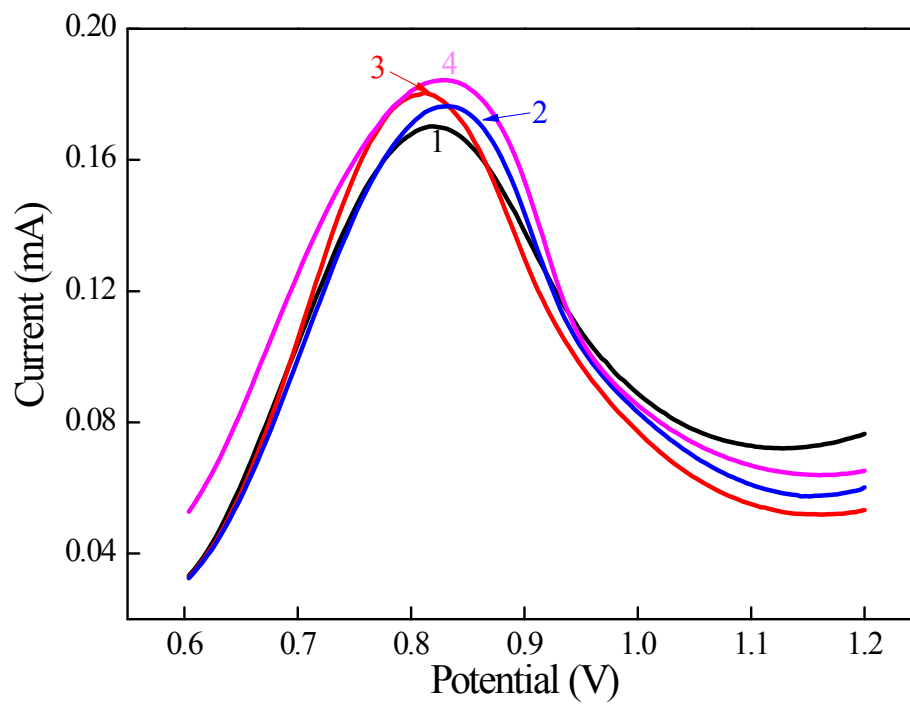

**Fig. S7** DPV curves of 4 different BN whiskers electrodes
